# Supplementary material for: A tunable synthesis of indigoids: targeting indirubin through temperature
Source: Royal Society of Chemistry journal article supplement (doi:10.1039/d2ra00400c), 2022-01-01

## Supporting Information

### **A Tunable Synthesis of Indigoids: Targeting Indirubin through Temperature**

James A Shriver,<sup>\*a</sup> Kaylie S. Kaller, Ally L. Kinsey, Katelyn R. Wang, Summer R. Sterrenberg, Madi K. Van Vors, Joshua T. Cheek and John S. Horner

Correspondence may be to directed to:

James A. Shriver  
Central College  
Pella, IA 50219  
shriverj@central.edu

### **Table of Contents**

|                                                             |      |
|-------------------------------------------------------------|------|
| 1. NMR Spectra for new compounds.....                       | S-2  |
| 2. IR Spectra for new compounds.....                        | S-7  |
| 3. High Resolution Mass Spectrometry for new compounds..... | S-10 |

<sup>1</sup>H NMR of 5.

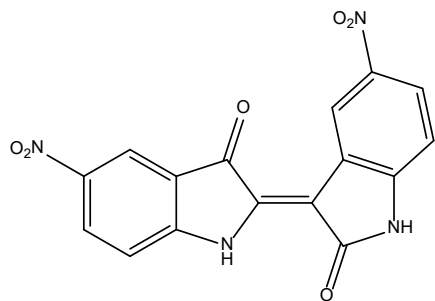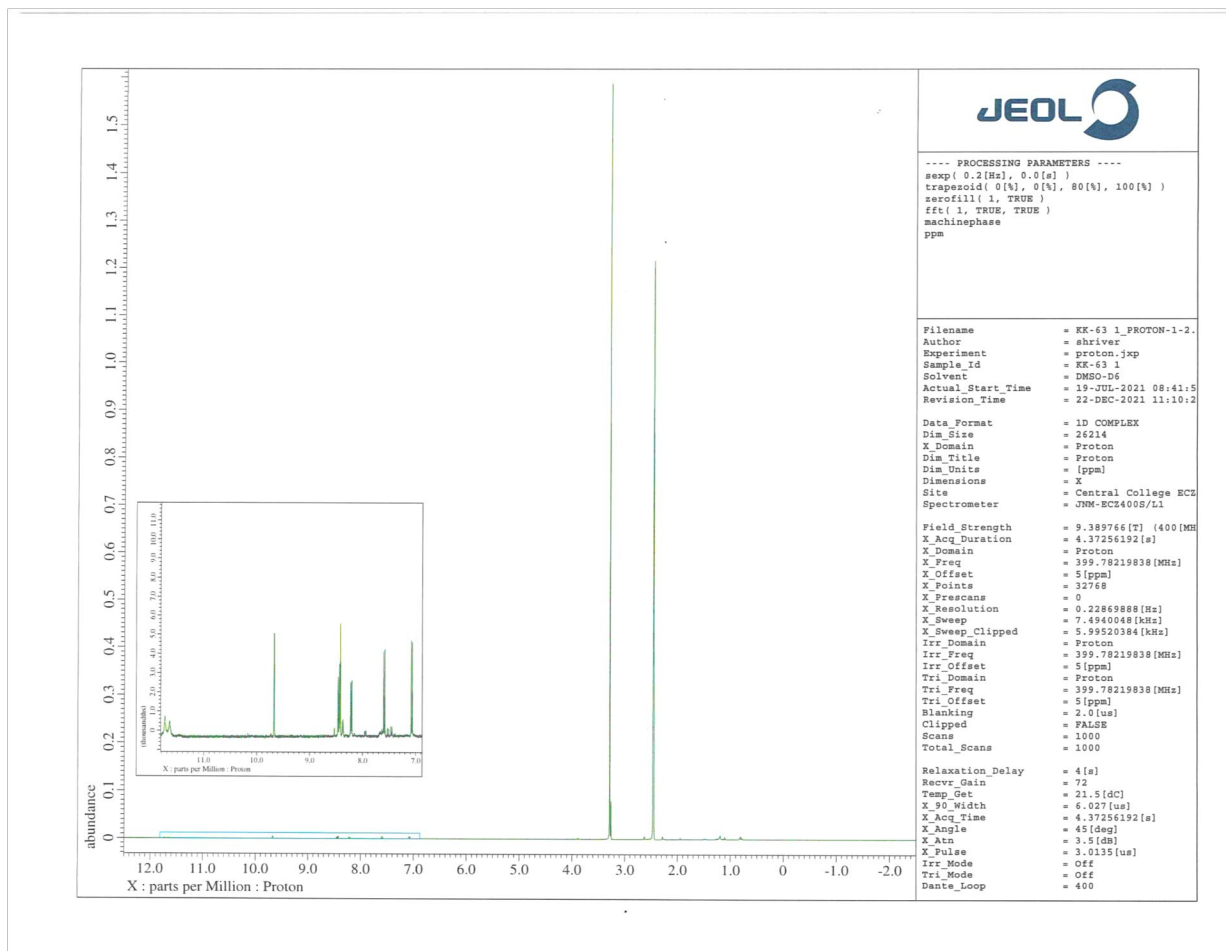

<sup>1</sup>H NMR of 35.

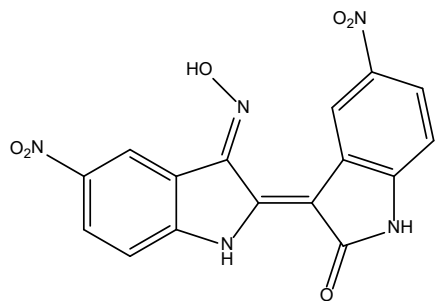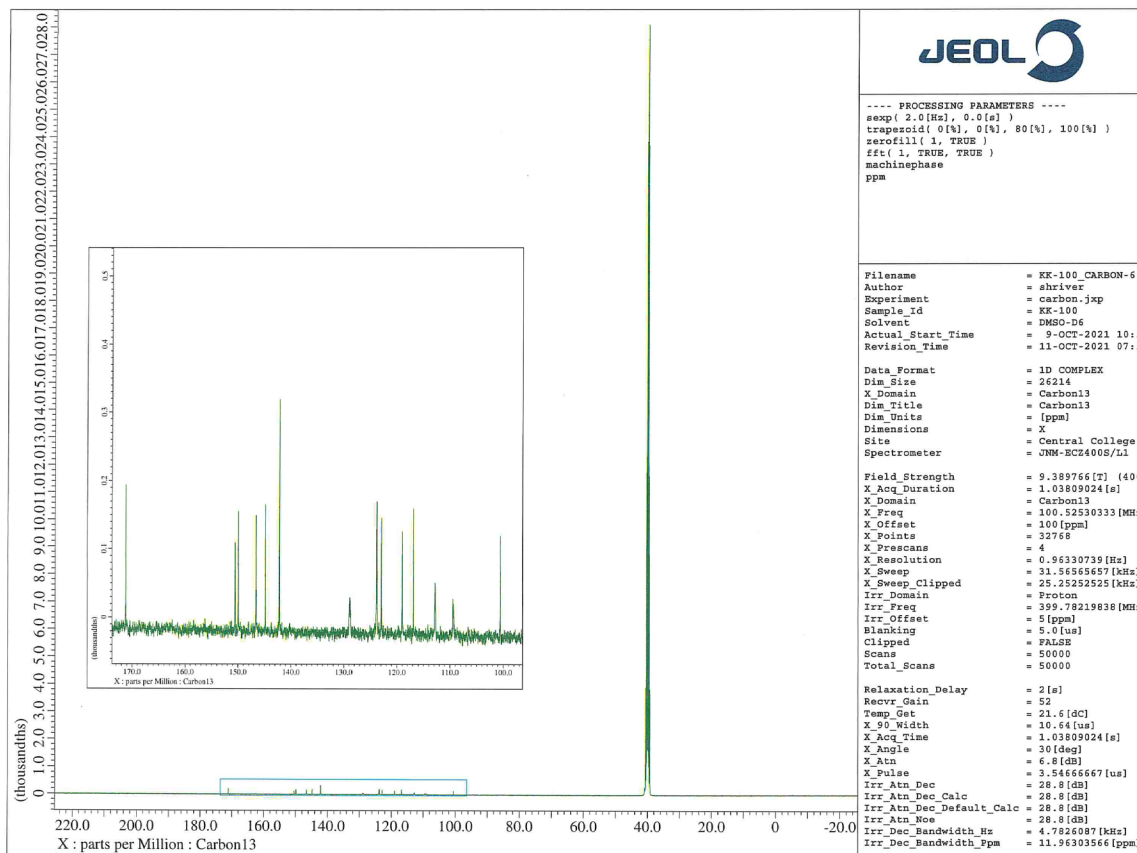

<sup>13</sup>C NMR of **35**.

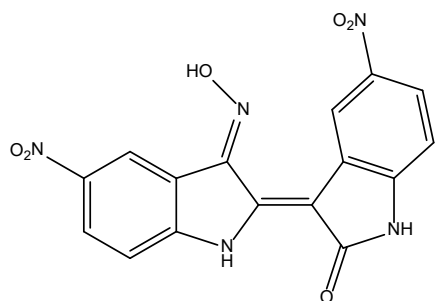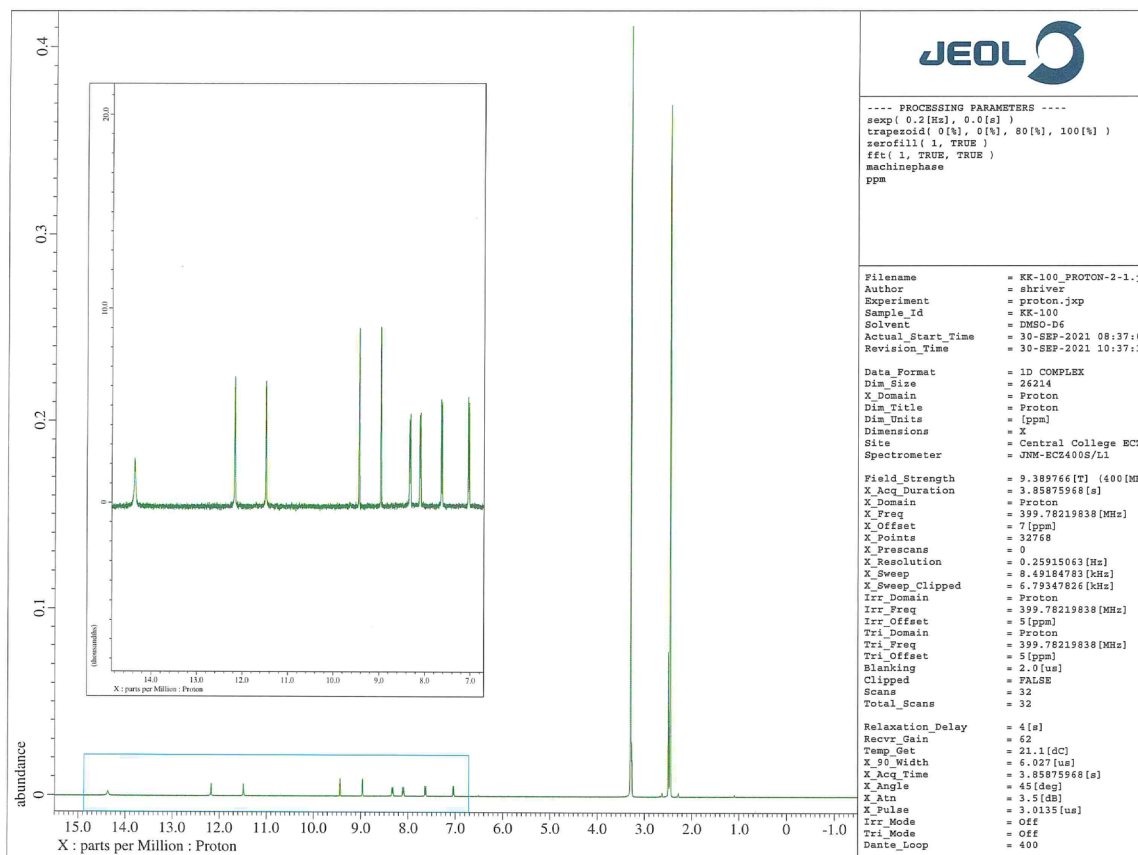

<sup>1</sup>H NMR of 15.

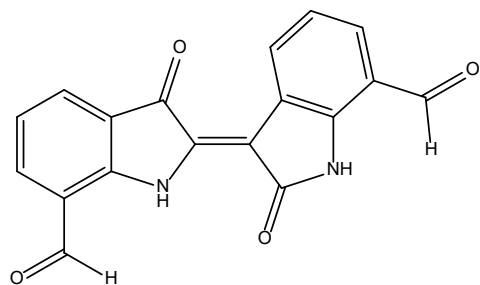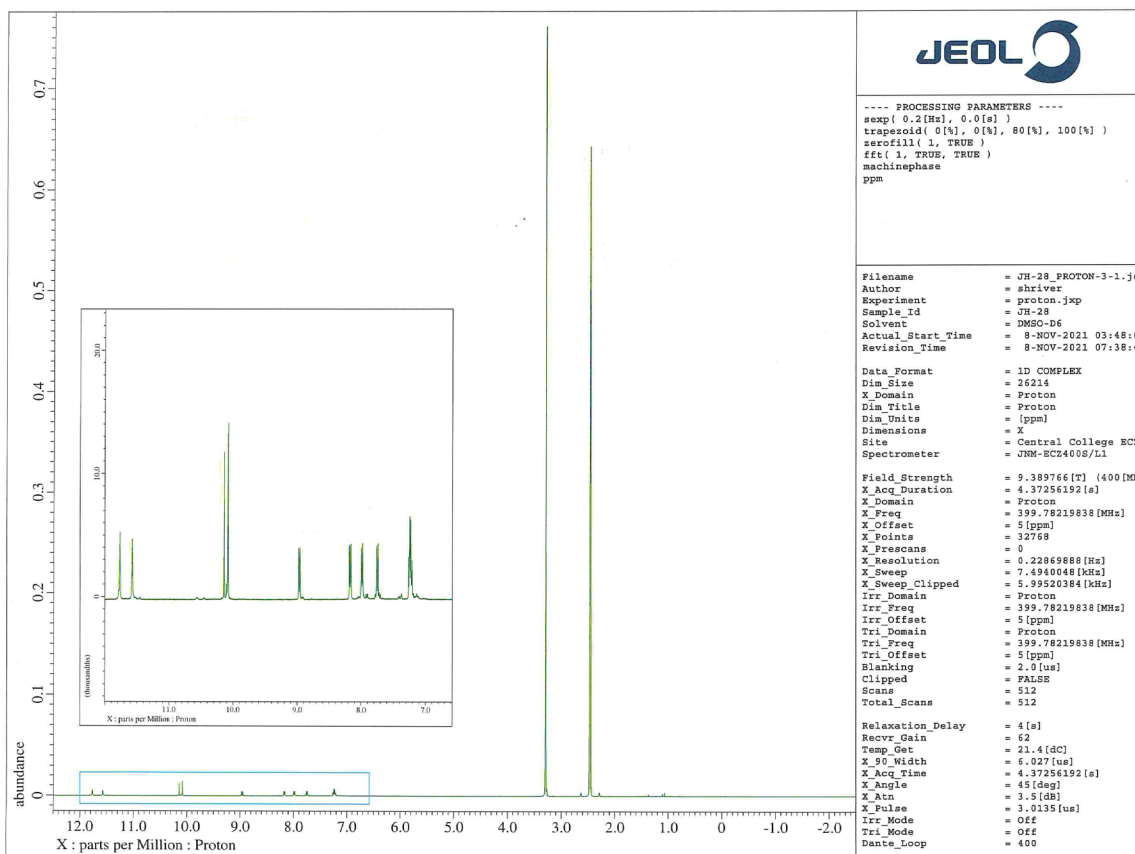

<sup>13</sup>C NMR of 15.

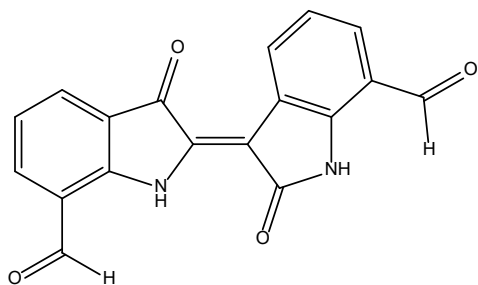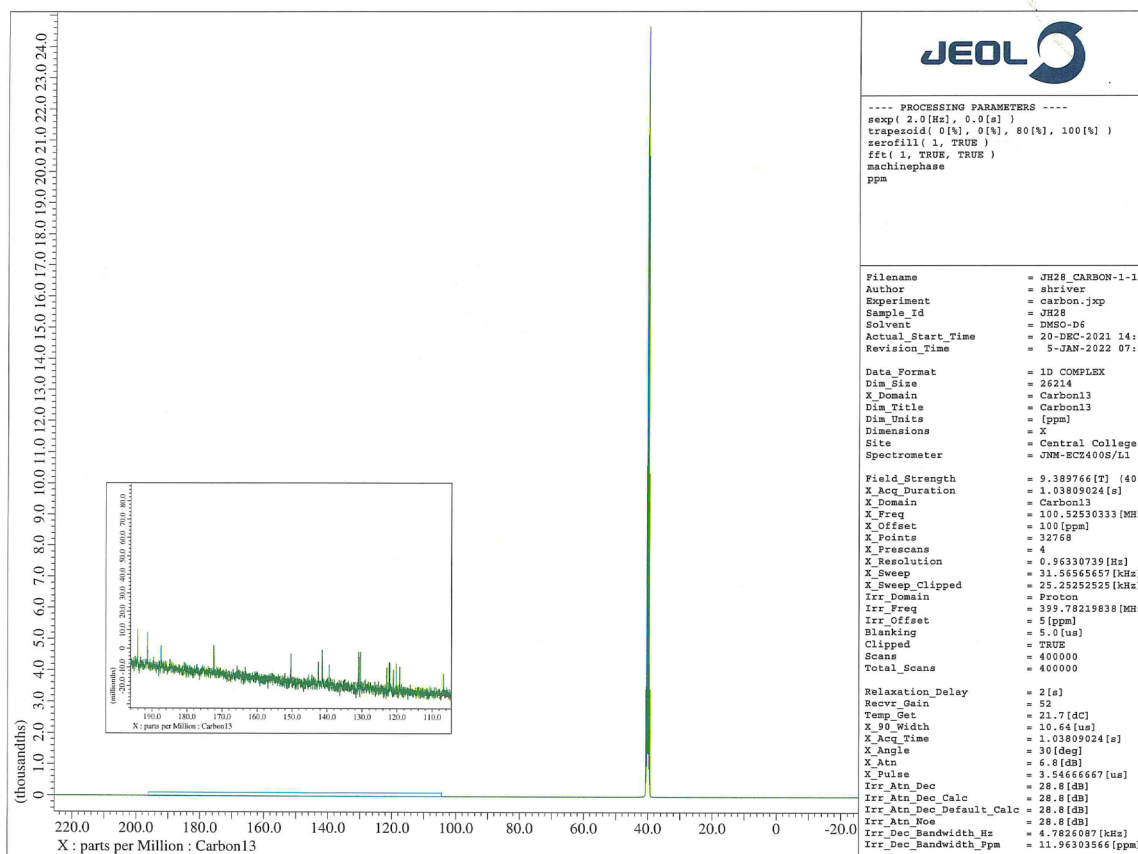

IR of 5.

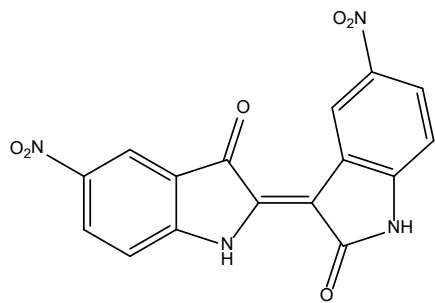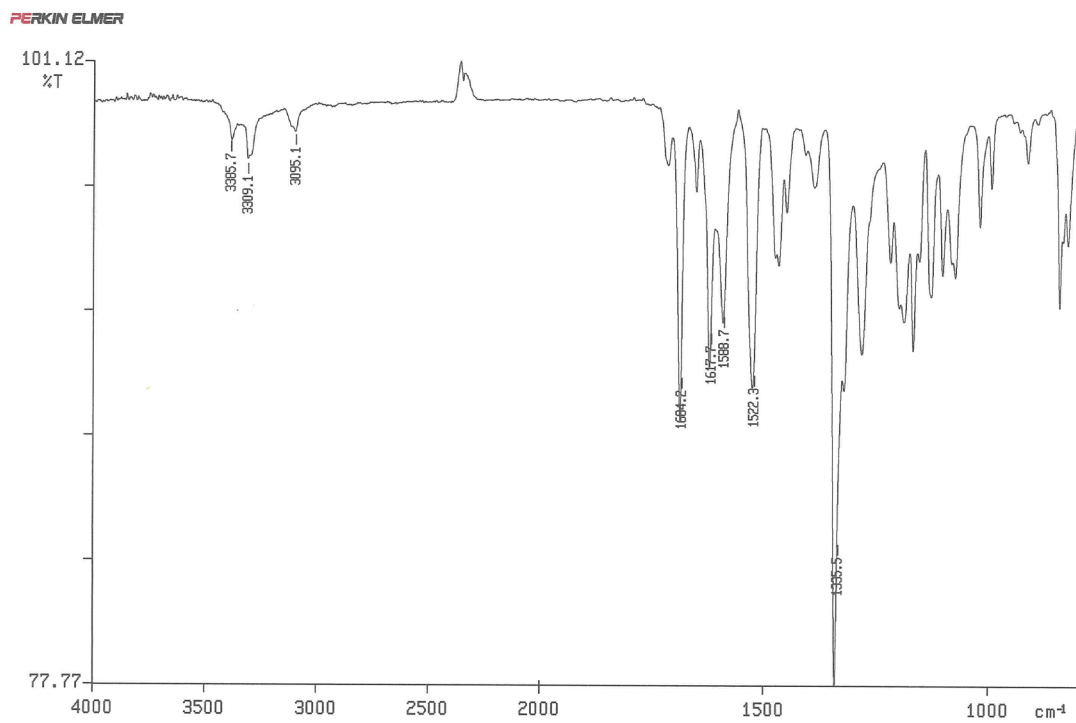

22/01/05 13:55 #1  
X: 16 scans, 4.0cm<sup>-1</sup>

IR of 35.

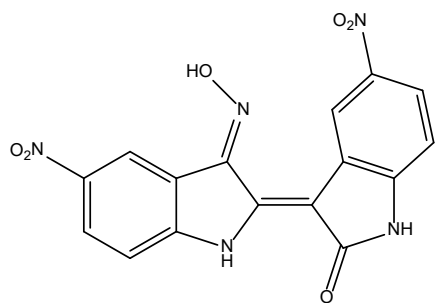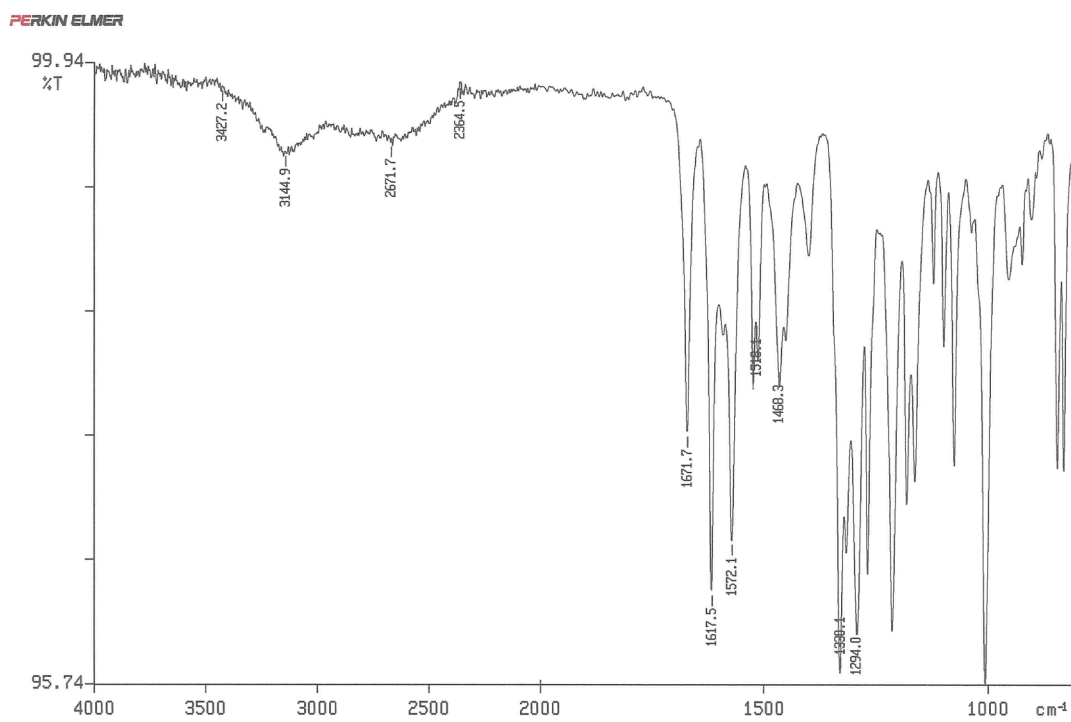

21/12/28 09:51 #1  
Y: 16 scans, 4.0cm<sup>-1</sup>



IR of 15.

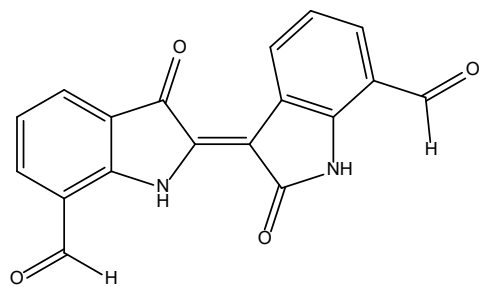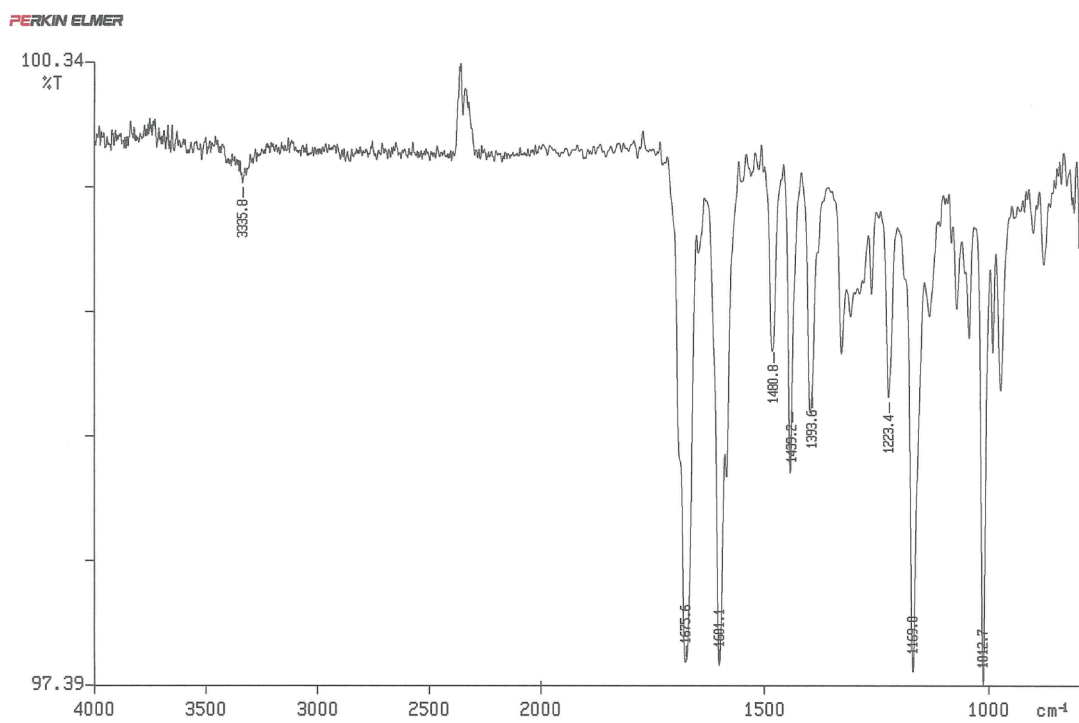

21/12/28 09:45 #1  
X: 16 scans, 4.0cm-1

HRMS (-ESI) of 5.

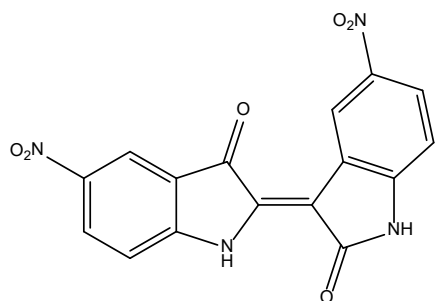

E:\QE\...010322\ShrKK 63  
Central College\Shriver

01/03/22 16:15:46

ShrKK 63 #23-197 RT: 0.1023-0.8778 AV: 175 NL: 3.64E6  
T: FTMS - p ESI Full ms [150.0000-1000.0000]

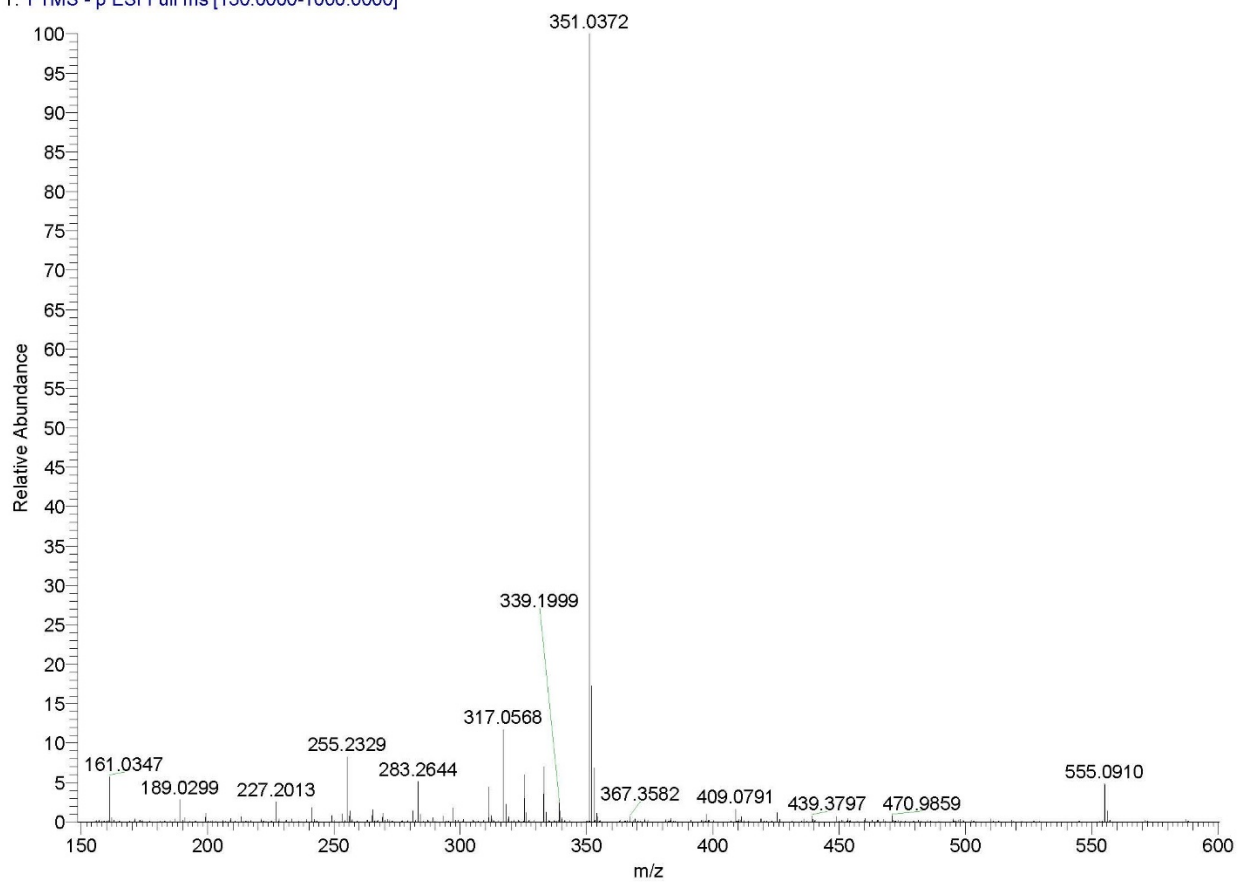

HRMS (-ESI) of 35.



ShrJH 100  
Central College\Shriver

01/04/22 09:10:03

ShrKK 100a #34-210 RT: 0.1513-0.9358 AV: 177 NL: 3.29E7  
T: FTMS - p ESI Full ms [150.0000-1000.0000]

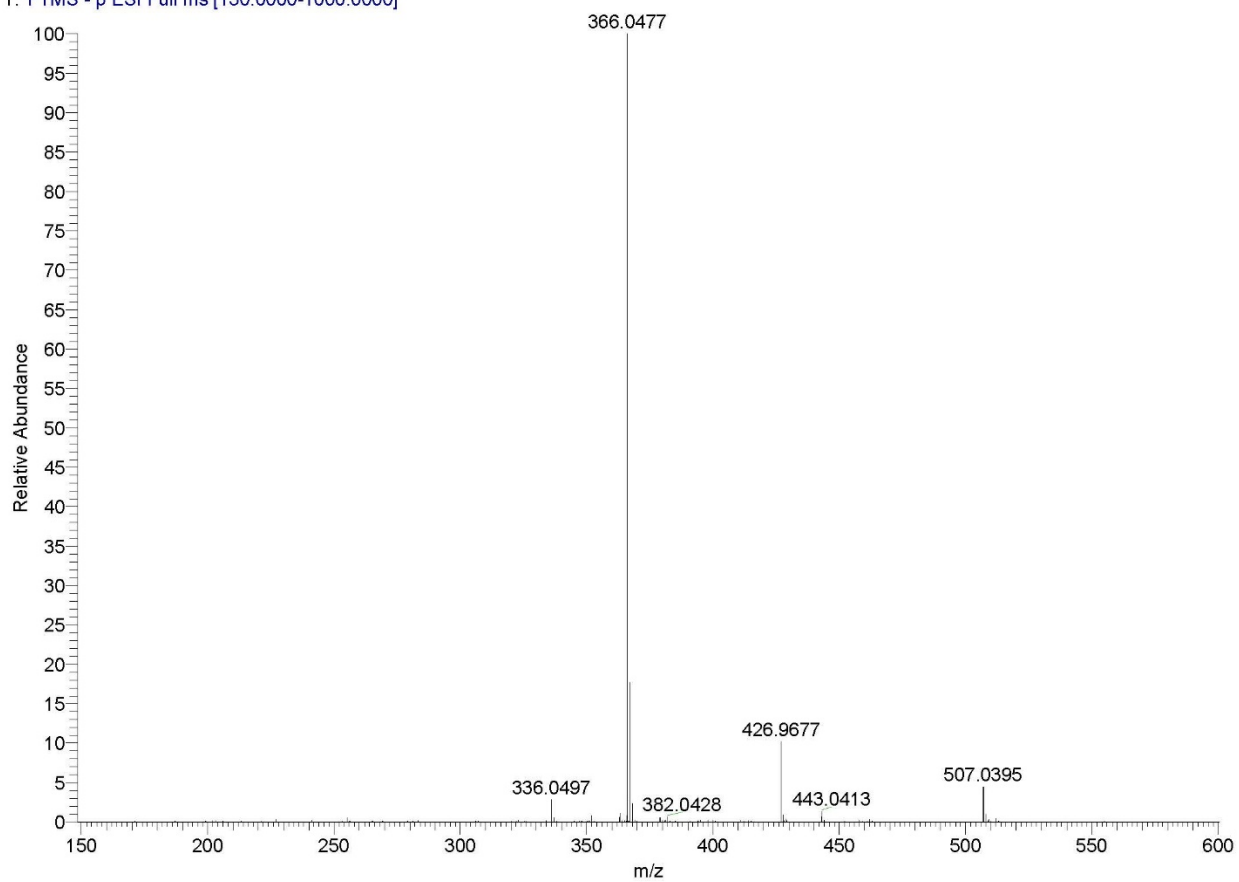

HRMS (-ESI) of 15.



ShrJH 28  
Central College\Shriver

01/03/22 15:51:23

ShrJH 28 b #18-77 RT: 0.0800-0.3430 AV: 60 NL: 8.30E5  
T: FTMS - p ESI Full ms [150.0000-1000.0000]

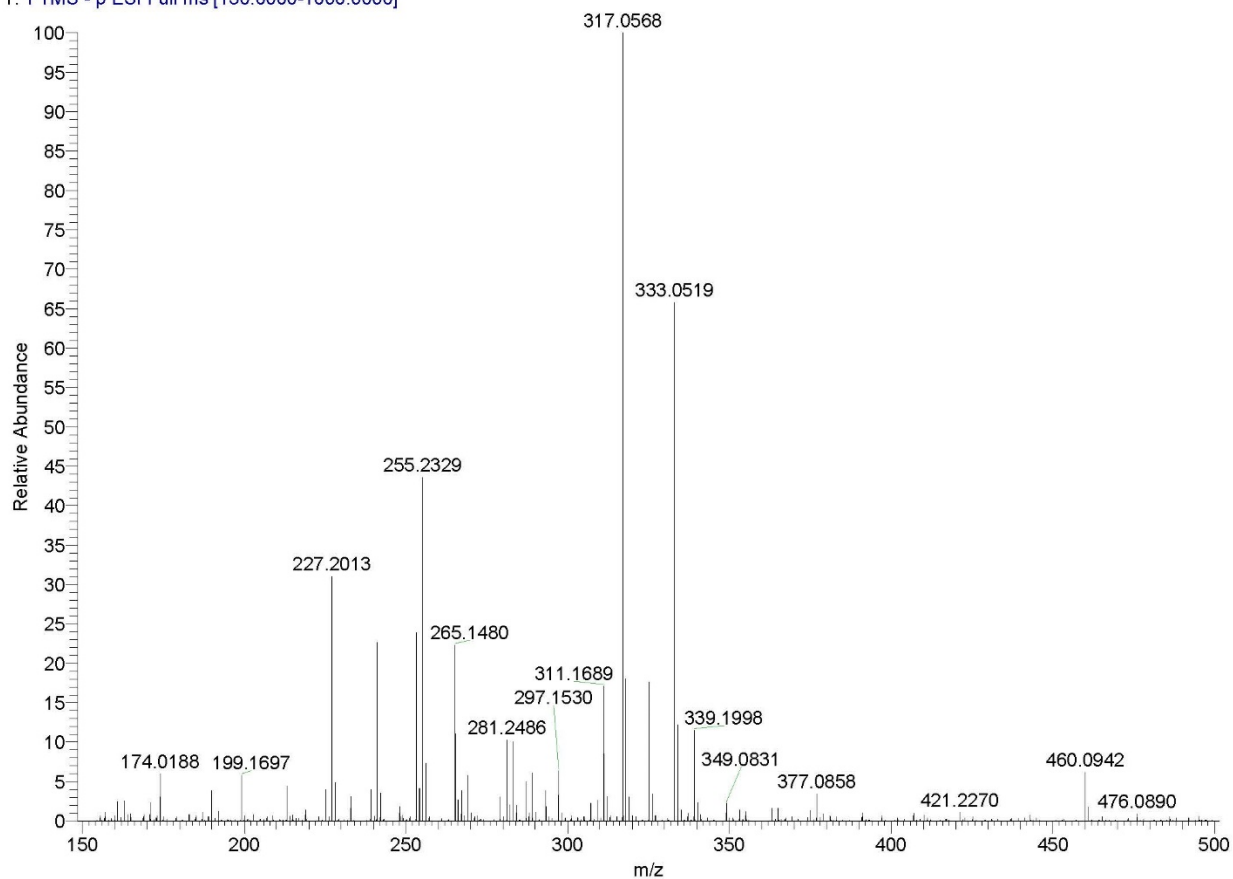

Supplement: d2ra00400c1.pdf [file d2ra00400c1.pdf]
